# Supplementary material for: Mathematical model of the Alzheimer’s disease biomarker cascade demonstrates statistical pitfall in identifying surrogates of cognitive reserve
Source: PubMed Central journal article supplement (PMC11607535; doi:10.1016/j.isci.2024.111188), 2024-10-18
Supplement: mmc1.pdf [file mmc1.pdf]

iScience, Volume 27

## **Supplemental information**

### **Mathematical model of the Alzheimer's disease biomarker cascade demonstrates statistical pitfall in identifying surrogates of cognitive reserve**

**Florian U. Fischer, Susanne Gerber, Oliver Tüscher, and for the Alzheimer's Disease  
Neuroimaging Initiative**

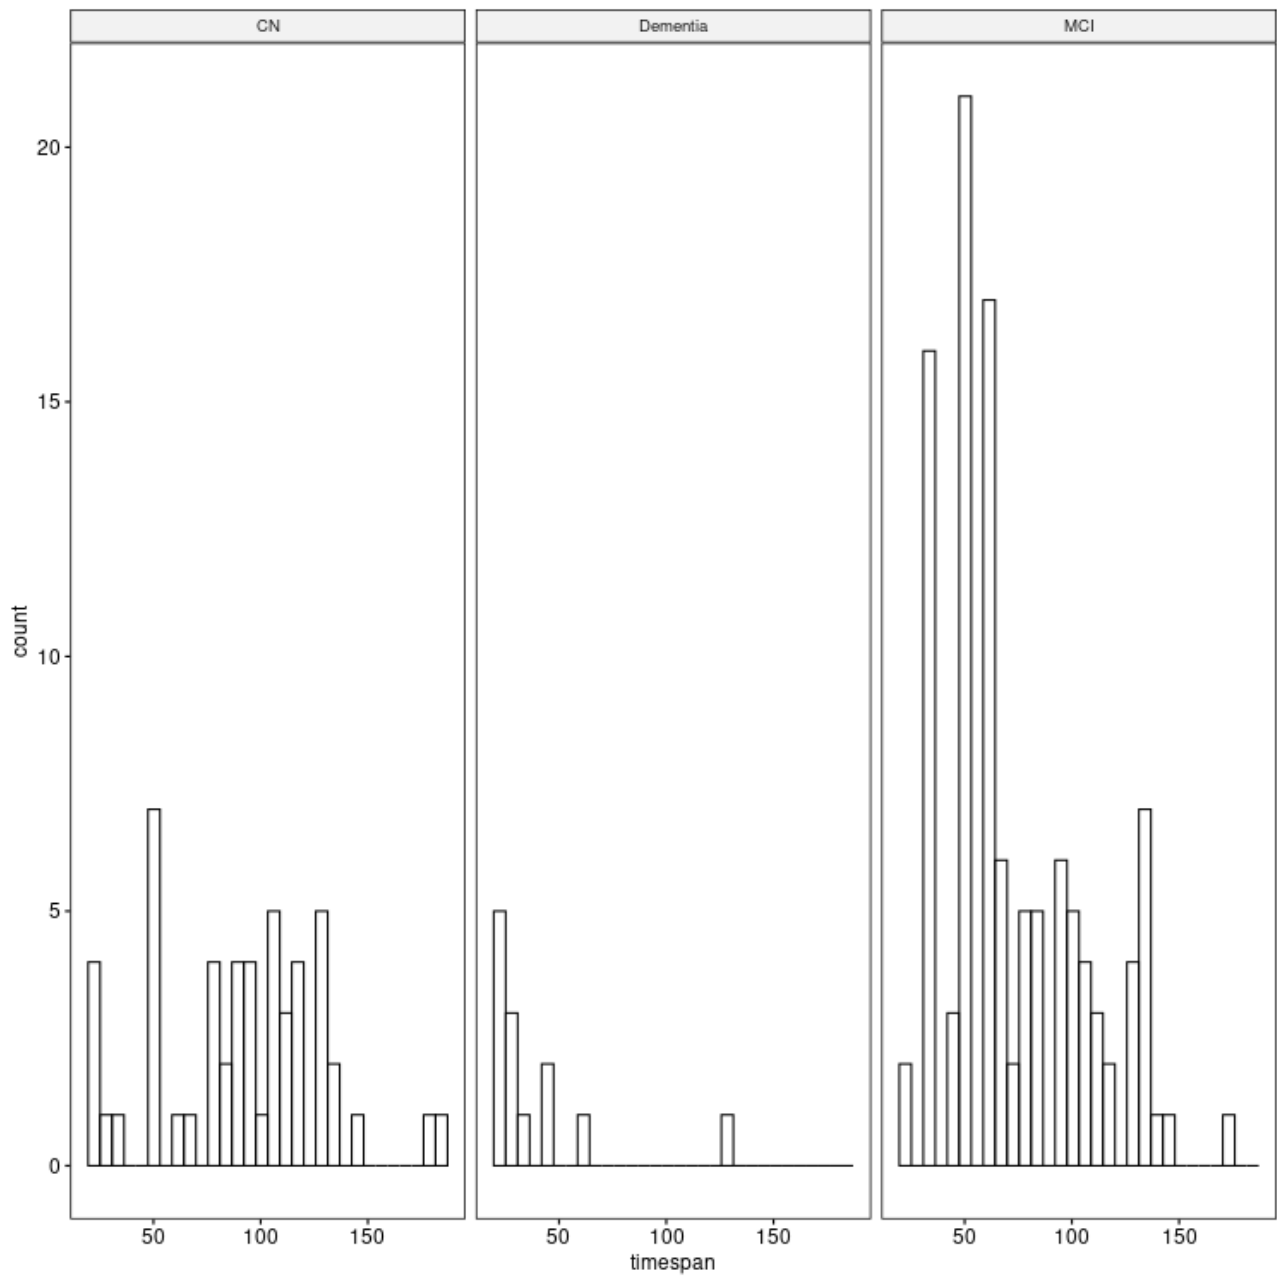

**Figure S1. Histogram of timespan from baseline to the last available empirical data point for each individual by clinical status at baseline.** CN, cognitively normal. Dementia, manifest Alzheimer’s disease. MCI, mild cognitive impairment. Timespan in months.
